# Supplementary material for: Probing the Roles of Calcium-Binding Sites during the Folding of Human Peptidylarginine Deiminase 4
Source: PubMed Central journal article supplement (PMC5445078; doi:10.1038/s41598-017-02677-1), 2017-05-25
Supplement: 41598_2017_2677_MOESM1_ESM.pdf [file 41598_2017_2677_MOESM1_ESM.pdf]

# Probing the Roles of Calcium-Binding Sites during the Folding of Human Peptidylarginine Deiminase 4

Yi-Liang Liu, Chien-Yun Lee, Yu-Ni Huang, Hui-Yi Chen, Guang-Yaw Liu and Hui-Chih Hung

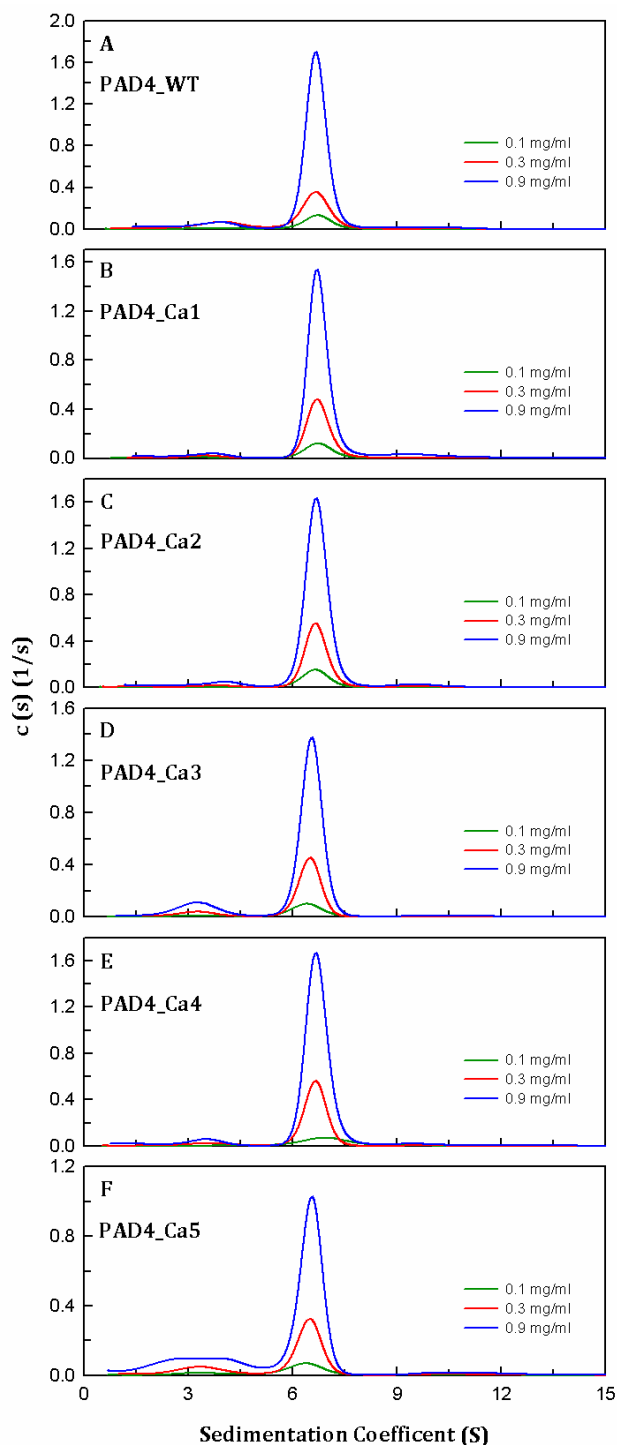

**Figure S1. Continuous sedimentation coefficient distributions of PAD4 WT and the calcium-binding-site mutant enzymes.**

(A) PAD4\_WT. (B) PAD4\_Ca1. (C) PAD4\_Ca2. (D) PAD4\_Ca3. (E) PAD4\_Ca4. (F) PAD4\_Ca5. Three protein concentrations (0.1, 0.3, and 0.9 mg/ml) were used, as indicated in the figure. The sedimentation velocity data were globally fit using the SEDPHAT program to obtain the dissociation constant ( $K_d$ ) of the PAD4 dimer (Table S1).

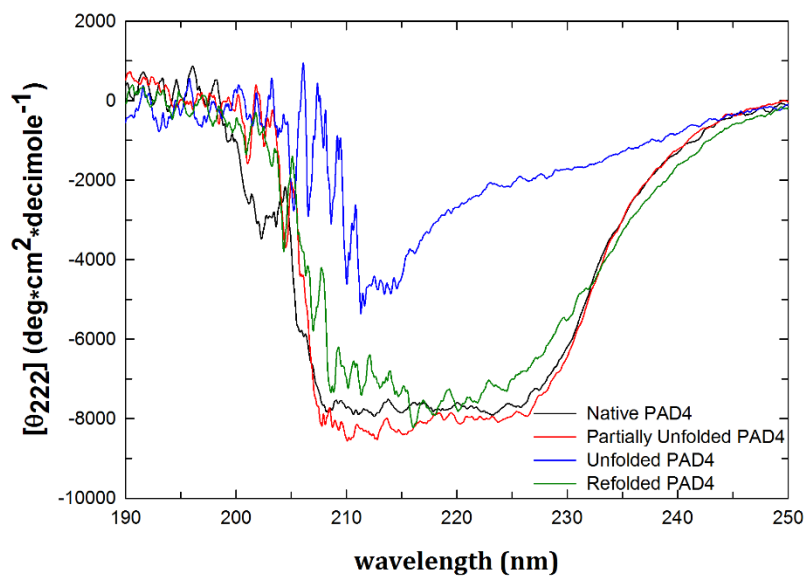

**Figure S2. Full CD spectra of PAD4 WT enzyme under the denatured and renatured conditions.**

The full CD spectra of the PAD4 enzyme in the native (0 M urea, black line), partially unfolded (1 M urea, red line), unfolded (8 M urea, blue line) and refolded (denatured with 8 M urea then renatured with 1 M urea, green line).

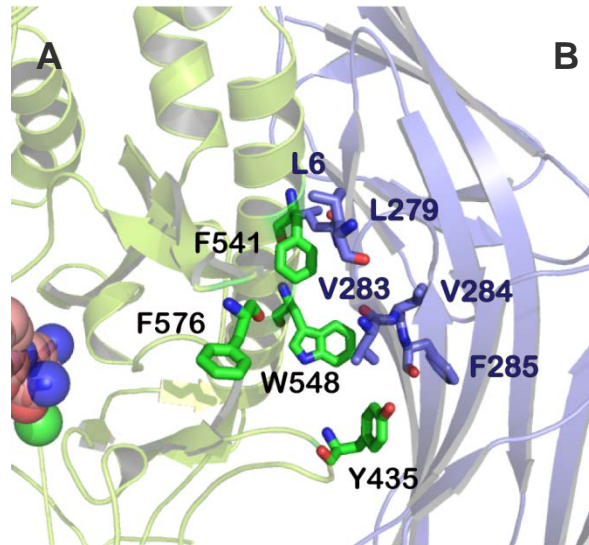

**Figure S3. Hydrophobic interface in the PAD4 dimer.**

Several hydrophobic amino acid residues in the dimer interface, including Y435, F541, W548 and F576 in the A subunit (colored in green) and L6, L279, V283, V284 and F285 in the B subunit (colored in purple).

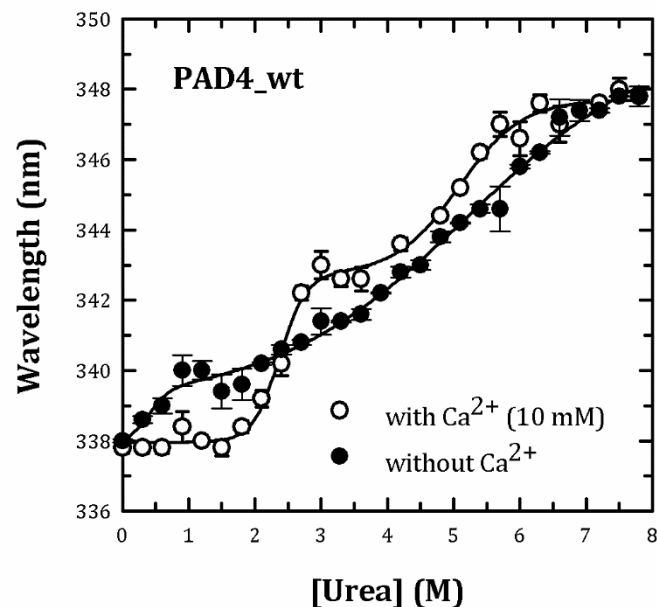

**Figure S4. Monitoring of urea-induced denaturation of the holo-form and apo-form of PAD4 through intrinsic protein fluorescence.**

PAD4 with 10 mM CaCl<sub>2</sub> (holo-form) or without 10 mM CaCl<sub>2</sub> (apo-form) was treated with various concentrations of urea in 50 mM Tris-HCl buffer (pH 7.4) at 25°C for 16 h and then monitored through intrinsic protein fluorescence measurements. Open circles: the PAD4 enzyme with 10 mM CaCl<sub>2</sub>. Closed circles: the PAD4 enzyme without 10 mM CaCl<sub>2</sub>. The experimental data were fitted by a three-state model. The fit results and residues are shown as a solid line with error bars.

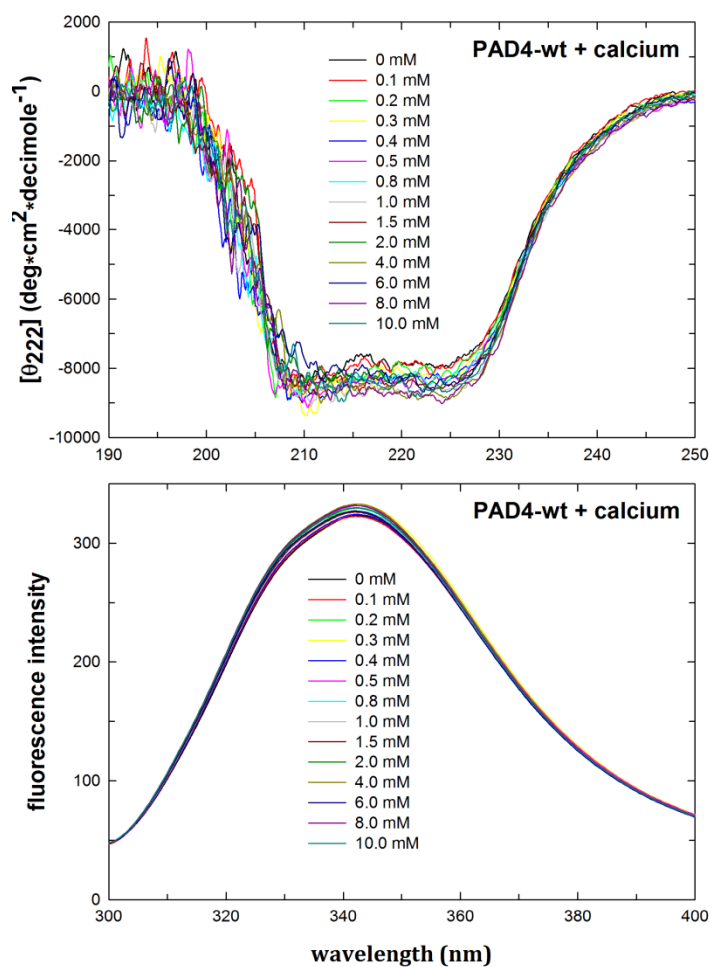

**Figure S5. Monitoring of the titration of Ca<sup>2+</sup> ions for PAD4 WT enzyme through CD and fluorescence.**

PAD4 with various concentrations of CaCl<sub>2</sub> in 50 mM Tris-HCl buffer (pH 7.4) at 25°C for 16 h and then monitored through CD and intrinsic protein fluorescence measurements.

**Table S1**

**Dissociation constant of the Ca1-, Ca2-, Ca3-, Ca4- and Ca5-binding site mutants**

| PAD4            | $K_d$ ( $\mu\text{M}$ ) |
|-----------------|-------------------------|
| Ca1_site mutant | $0.16 \pm 0.001$        |
| Ca2_site mutant | $0.15 \pm 0.001$        |
| Ca3_site mutant | $0.16 \pm 0.001$        |
| Ca4_site mutant | $0.41 \pm 0.004$        |
| Ca5_site mutant | $0.17 \pm 0.002$        |
